# Supplementary material for: Tumor promotion through the mesenchymal stem cell compartment in human hepatocellular carcinoma
Source: PubMed Central journal article supplement — Carcinogenesis. 2013 Jun 5;34(10):2330–40. doi: 10.1093/carcin/bgt210 (PMC3786382; doi:10.1093/carcin/bgt210), 2013-06-05

Figure S1

### STRO-1 in MSc Culture

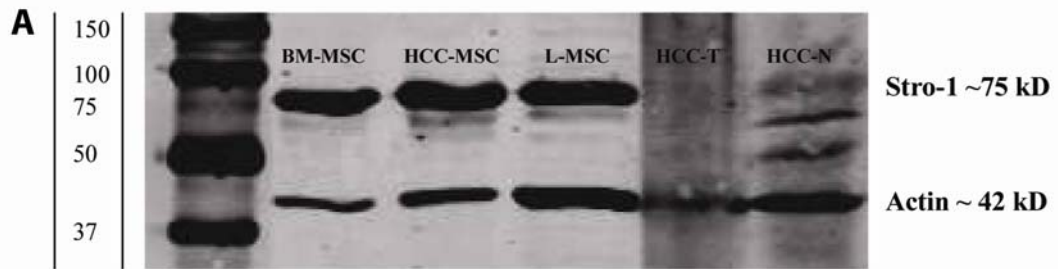

**B**

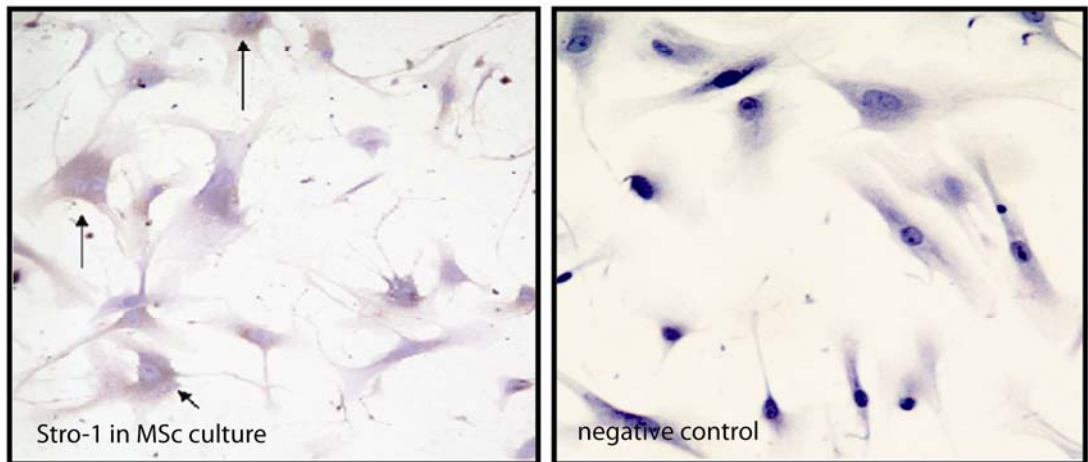

Figure S2

**STRO-1**

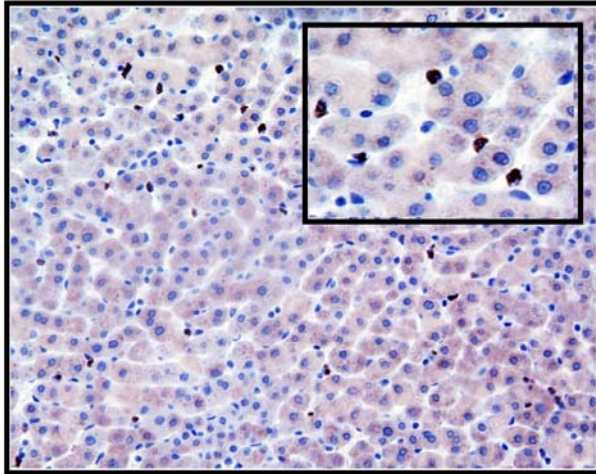

inflammation -

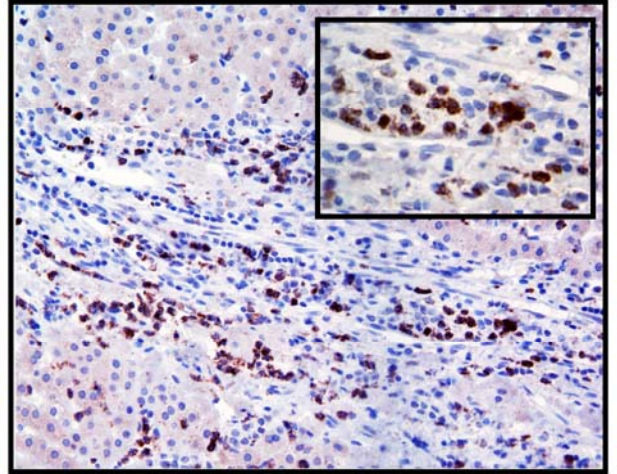

inflammation +

Figure S3

PCA Mapping (79.9%)

Huh7 cell line

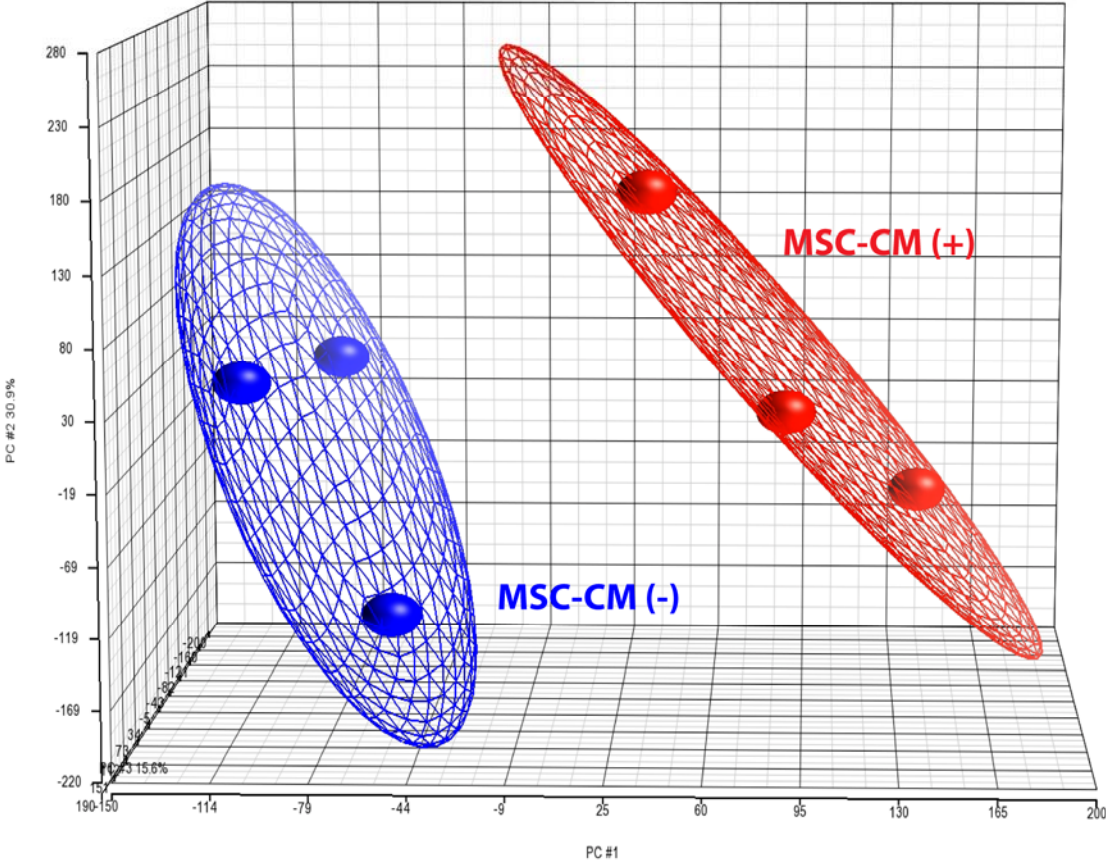

Figure S4

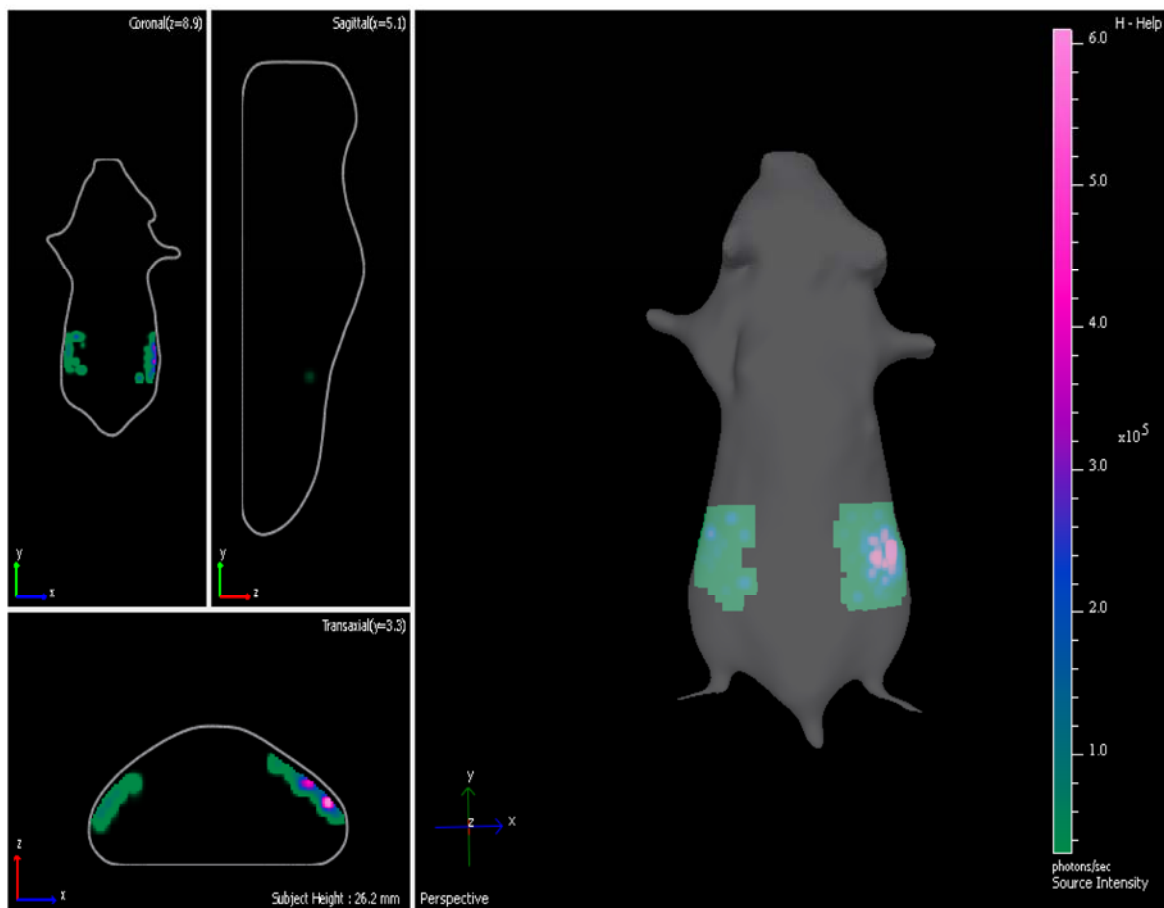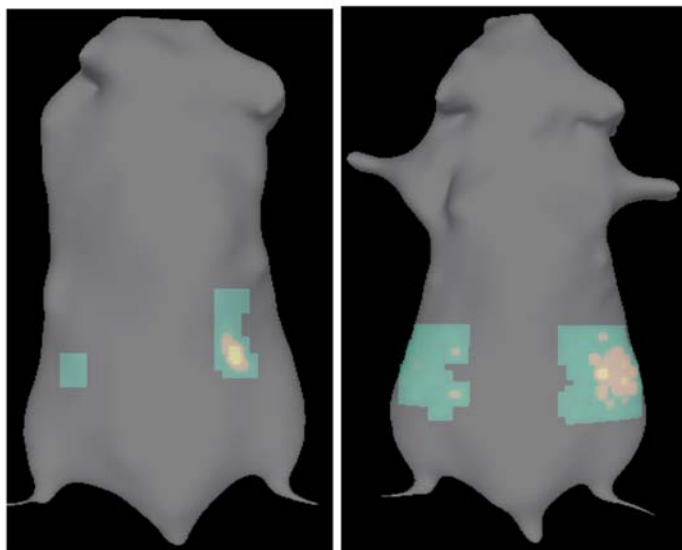

Figure S5

## CD 146

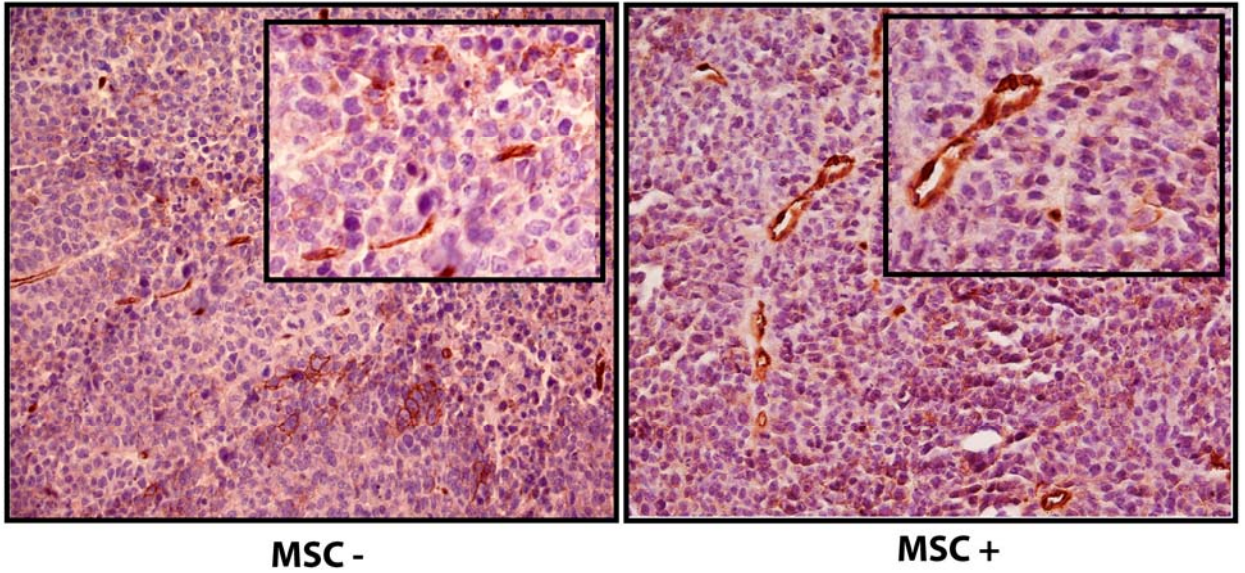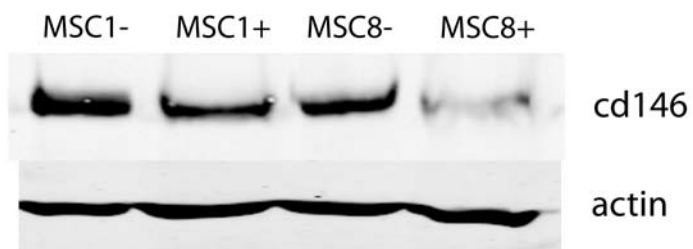



Figure S6

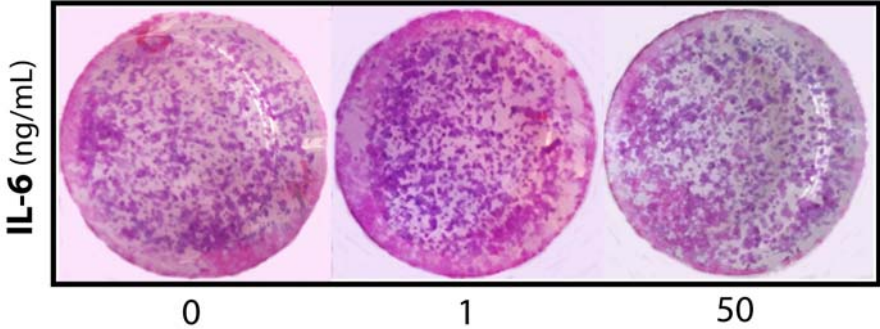

Figure S7

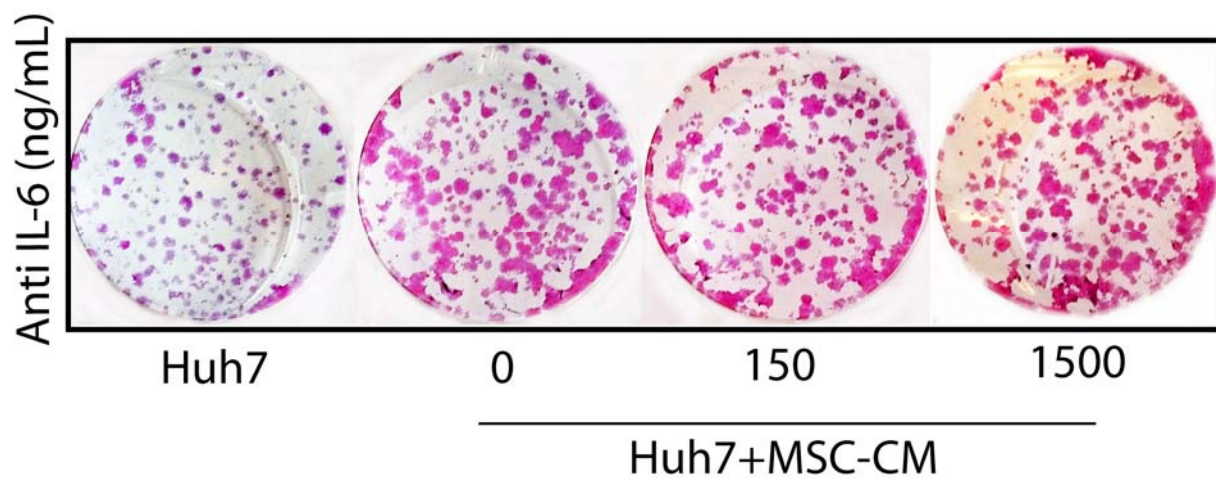

Supplement: supp_bgt210_Supplementary_Figures.pdf [file supp_bgt210_Supplementary_Figures.pdf]
